# Supplementary material for: Structure determination of β-Pb2ZnF6 by coupling multinuclear solid state NMR, powder XRD and ab initio calculations
Source: Royal Society of Chemistry journal article supplement (doi:10.1039/b810863c), 2008-01-01
Supplement: b810863c.pdf [file b810863c.pdf]

## Structure determination of $\beta$ -Pb<sub>2</sub>ZnF<sub>6</sub> by coupling multinuclear solid state NMR, powder XRD and ab initio calculations

Charlotte Martineau, Franck Fayon, Christophe Legein, Jean-Yves Buzaré, Monique Body, Dominique Massiot, François Goutenoire

### Electronic Supplementary Information

**Table 1** Conditions of X-ray data collection and refinement parameters of  $\beta$ -Pb<sub>2</sub>ZnF<sub>6</sub>

---

|                                    |                                                                                                                         |
|------------------------------------|-------------------------------------------------------------------------------------------------------------------------|
| Diffractionmeter                   | PANalytical X'pert PRO equipped with an Anton Paar HTK 1200 high-temperature heating chamber                            |
| Radiation                          | CuK $\alpha$ , 40kV, 35mA                                                                                               |
| Divergence, antiscattering slits/° | 0.50                                                                                                                    |
| Receiving slit/°                   | 1.00                                                                                                                    |
| Angular range/°2 $\theta$          | 5-140                                                                                                                   |
| Step scan increment/°2 $\theta$    | 0.017                                                                                                                   |
| Count time/sec.step <sup>-1</sup>  | 500                                                                                                                     |
| Temperature/°C                     | 90 (under argon atmosphere)                                                                                             |
| Space group                        | P4 <sub>2</sub> /ncm (No.138)                                                                                           |
| Cell parameters/Å                  | a = 5.632 (1), c = 16.247 (1)                                                                                           |
| Volume/Å <sup>3</sup> ; Z          | 515.35 (1); Z = 4                                                                                                       |
| Number of reflections              | 286                                                                                                                     |
| Number of refined parameters       | 17                                                                                                                      |
| Half-width parameters              | U = 0.042 (2), V = -0.014 (2), W = 0.0071 (3)                                                                           |
| Peak shape                         | Pseudo-Voigt 0.63 (2)                                                                                                   |
| Zero point/°2 $\theta$             | 0.0456 (3)                                                                                                              |
| Reliability factors                | R <sub>p</sub> = 0.159, R <sub>wp</sub> = 0.133, R <sub>exp</sub> = 0.0549, $\chi^2$ = 5.83, R <sub>Bragg</sub> = 0.095 |

---
